# Supplementary material for: Characteristics of Patent Ductus Arteriosus in Congenital Rubella Syndrome
Source: PubMed Central journal article supplement (PMC6863812; doi:10.1038/s41598-019-52936-6), 2019-11-19

**Title page****Characteristics of Patent Ductus Arteriosus in Congenital Rubella Syndrome**

Michiko Toizumi, MD, PhD,<sup>1,2</sup> Cam Giang T. Do, MD,<sup>3</sup> Hideki Motomura, MD, PhD,<sup>4</sup> Tin N. Do, MD,<sup>3</sup> Hirofumi Fukunaga, MD<sup>5</sup>, Makiko Iijima, MD,<sup>6</sup> Nhan NT. Le, MD,<sup>7</sup> Hung Thanh Nguyen, MD, PhD,<sup>7</sup> Hiroyuki Moriuchi, MD, PhD,<sup>2,8</sup> and Lay-Myint Yoshida, MD, PhD<sup>1,8\*</sup>

**Affiliations:**

<sup>1</sup>Department of Pediatric Infectious Diseases, Institute of Tropical Medicine, Nagasaki University, Nagasaki, Japan; <sup>2</sup>Department of Global Health, School of Tropical Medicine and Global Health, Nagasaki University, Nagasaki, Japan; <sup>3</sup>Department of Cardiology, Children's Hospital 1, Ho Chi Minh City, Vietnam; <sup>4</sup>Department of Pediatrics, Nagasaki Medical Center, Omura, Japan; <sup>5</sup>Department of Pediatrics, Nagasaki University Hospital, Nagasaki, Japan; <sup>6</sup>Expanded Programme on Immunization, WHO representative office in Viet Nam, Hanoi, Vietnam; <sup>7</sup>Outreach and International Department, Children's Hospital 1, Ho Chi Minh City, Vietnam; <sup>8</sup>Graduate School of Biomedical Sciences, Nagasaki University, Nagasaki, Japan

**\*Corresponding author**

Lay-Myint Yoshida, Department of Pediatric Infectious Diseases, Institute of Tropical Medicine, Nagasaki University, 1-12-4 Sakamoto, Nagasaki 852-8523, Japan. E-mail: [lm Yoshi@nagasaki-u.ac.jp](mailto:lm Yoshi@nagasaki-u.ac.jp), Tel.: +81-95-819-7764, Fax: +81-95-819-7844

**Supplemental table 1. Numbers of transcatheter therapy and transcatheter patent ductus arteriosus occlusion therapy at the Department of Cardiology, Children’s Hospital 1**

| Year                            | 2011 | 2012 | 2013 | 2014 | 2015 | Total in 5 years |
|---------------------------------|------|------|------|------|------|------------------|
| Transcatheter therapy (a)       | 494  | 770  | 553  | 581  | 580  | 2978             |
| Transcatheter PDA occlusion (b) | 419  | 495  | 273  | 187  | 225  | 1599             |
| (b)/(a) (%)                     | 84.8 | 64.3 | 49.4 | 32.2 | 38.8 | 53.7             |

PDA; patent ductus arteriosus

**Supplemental table 2. Definition of Congenital Rubella Syndrome (CRS)<sup>29</sup>**

1) Symptoms suggesting CRS are symptoms in Group (A) and (B) as below.

| Group A                      | Group B                              |
|------------------------------|--------------------------------------|
| congenital heart disease     | purpura                              |
| cataract(s)                  | jaundice within 24 hours after birth |
| glaucoma                     | hepatosplenomegaly                   |
| suspected hearing impairment | meningoencephalitis <sup>a</sup>     |
|                              | developmental delay                  |
|                              | microcephaly                         |

2) Confirmed CRS and Probable CRS

Confirmed CRS

one with any clinical manifestations of CRS (A and B) confirmed on a laboratory test<sup>b</sup>.

Probable CRS

one that is not laboratory confirmed but includes either 2 of the clinical signs listed in group (A) or 1 of the clinical signs listed in group (A) and 1 of the clinical signs listed in group (B) with no evidence of any other etiology.

a; Meningoencephalitis was defined clinically according to the presence of abnormal neurologic findings and signs of meningeal irritation, such as neck stiffness, altered consciousness, bulging fontanel, and convulsions.

b; Cases were laboratory confirmed based on the detection of rubella-specific immunoglobulin M antibodies in infancy.

Supplemental figure. Number of transcatheter patent ductus arteriosus occlusion therapy between 2011 and 2015, at Children's Hospital 1 in Ho Chi Minh City, sorted by birth months

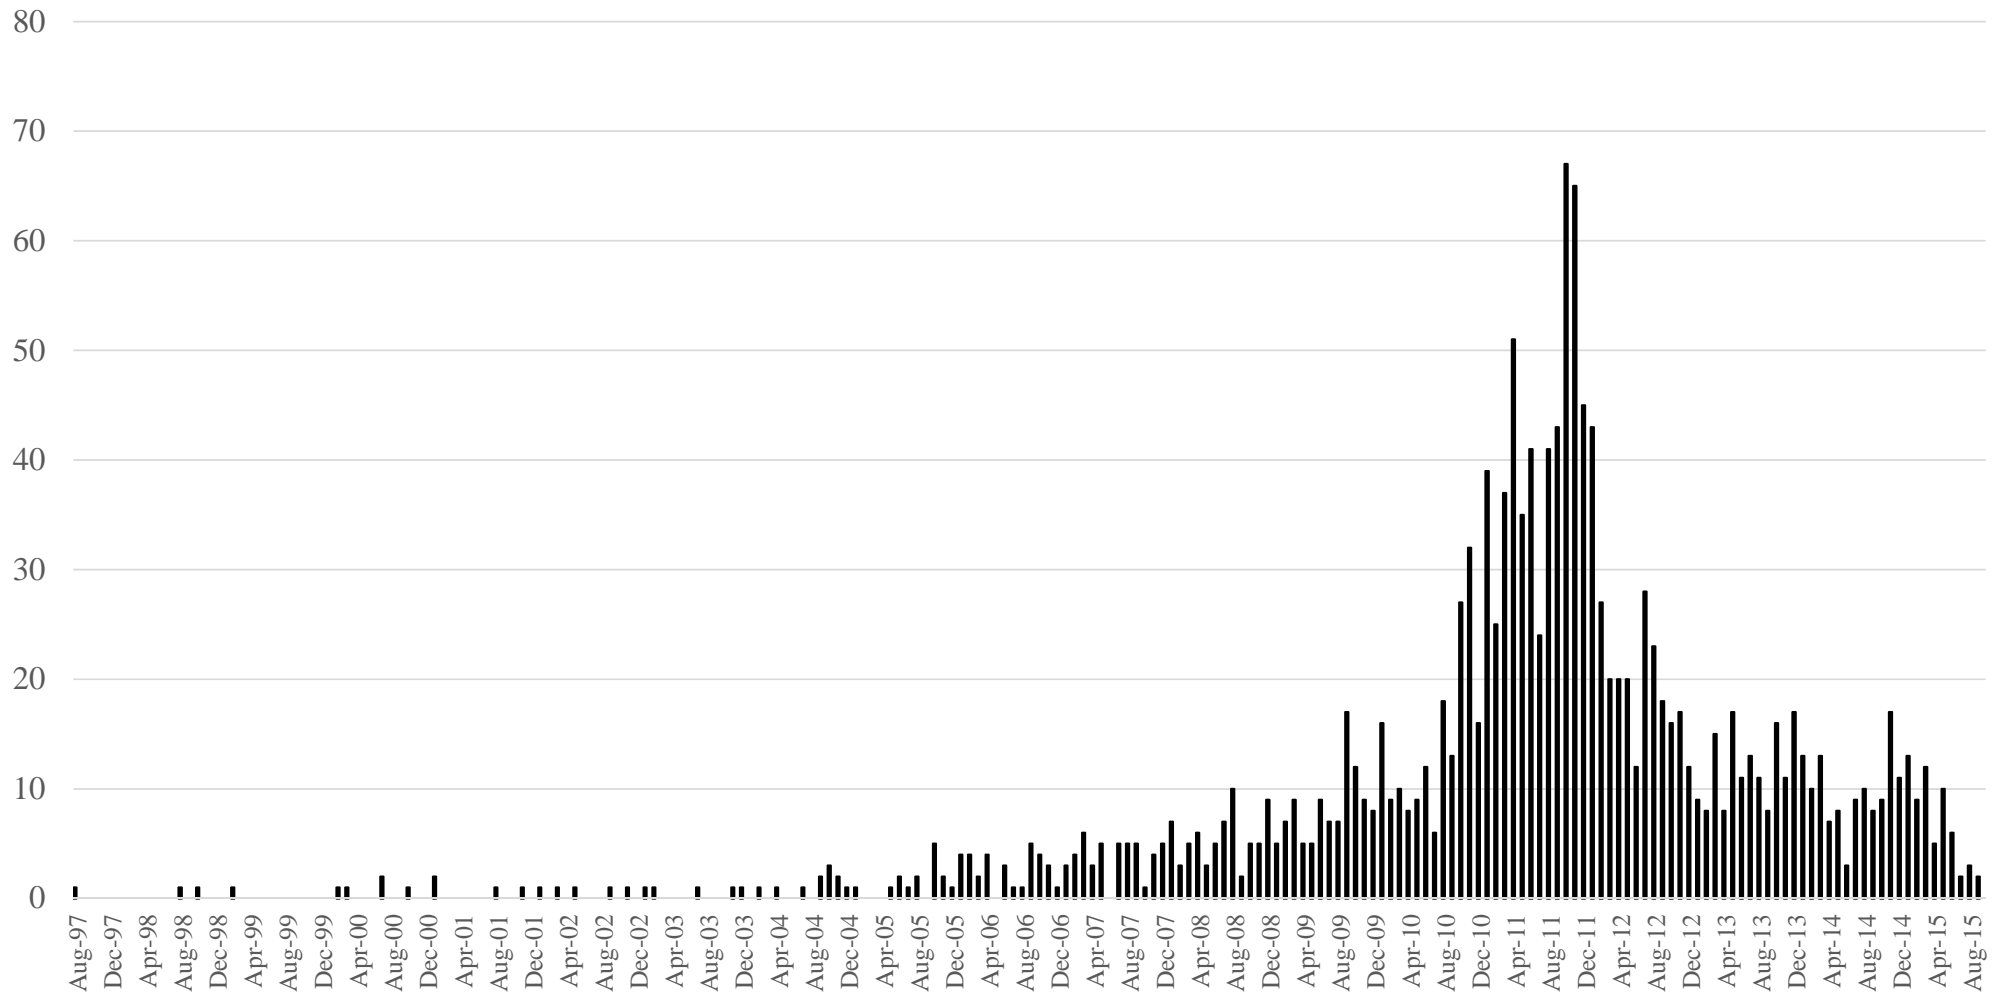

Supplement: 41598_2019_52936_MOESM1_ESM.pdf [file 41598_2019_52936_MOESM1_ESM.pdf]
